# Supplementary material for: Cell Penetrating Peptide-Based Self-Assembly for PD-L1 Targeted Tumor Regression
Source: MDPI journal article supplement (doi:10.3390/ijms222413314), 2021-12-10
Supplement: s1 [file s1]

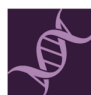

Article

# Cell Penetrating Peptide-Based Self-Assembly for PD-L1 Targeted Tumor Regression

Feng Guo <sup>1,2,3</sup>, Junfeng Ke <sup>1,2,3</sup>, Zhengdong Fu <sup>1,2,3</sup>, Wenzhao Han <sup>1,2,3</sup> and Liping Wang <sup>1,2,3,\*</sup>

## Supplementary data

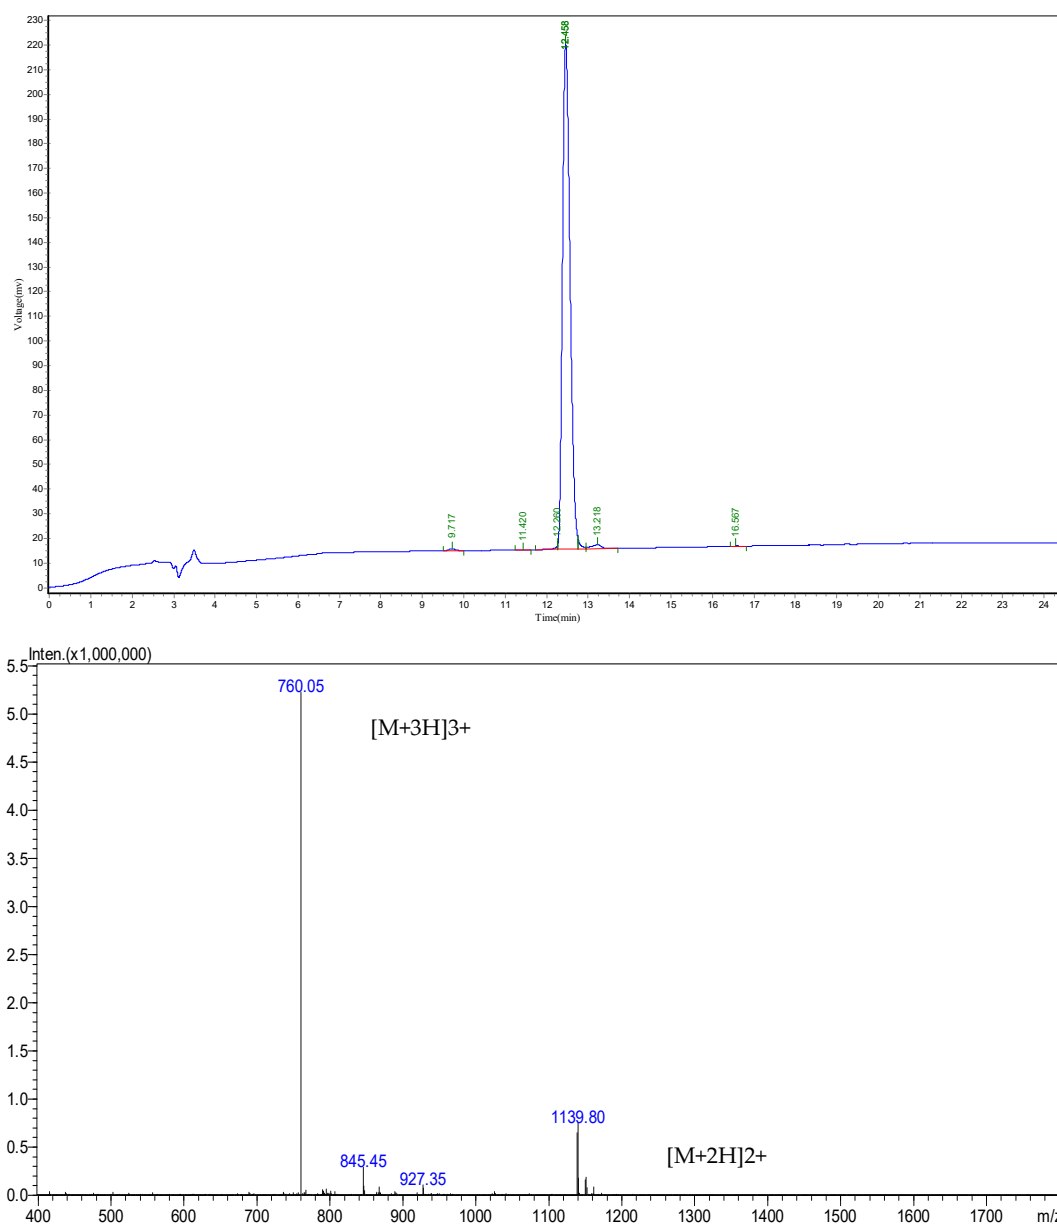

**Figure S1.** High-performance liquid chromatography (HPLC) spectrum and mass spectrometry of peptide. HPLC was performed with 73% (0.1% TFA) water and 27% acetonitrile (0.1% TFA), which indicated that the purity of peptide was more than 97.4%. Mass spectrometry showed the main peaks of peptide with 3 or 2 H<sup>+</sup>, proving the relative molecular weight to be 2277.74. The results illustrated the peptide were successfully synthesized.

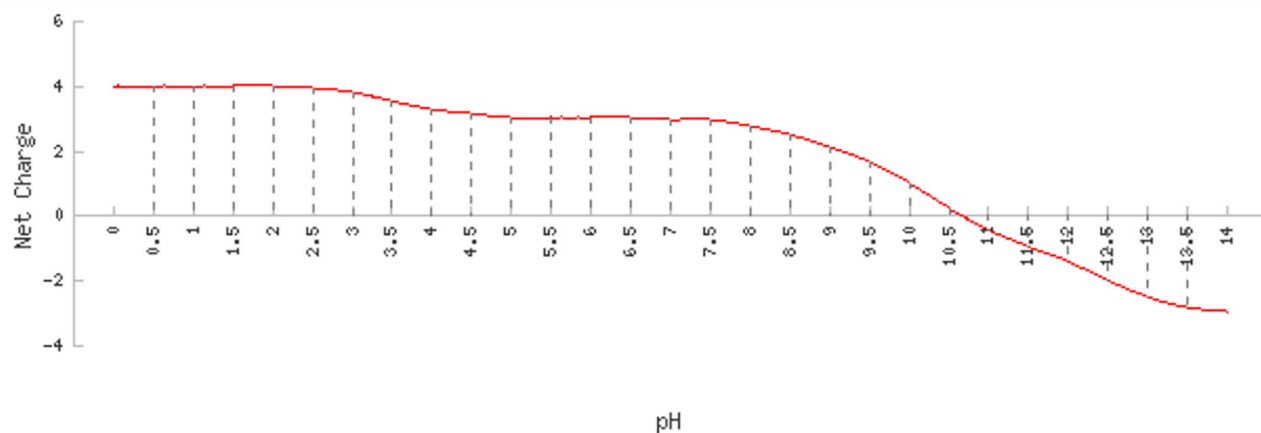

**Figure S2.** Net charge of peptide in aqueous solution, calculated by the online tool 'Concentration polypeptide property calculator' from NovoPro.

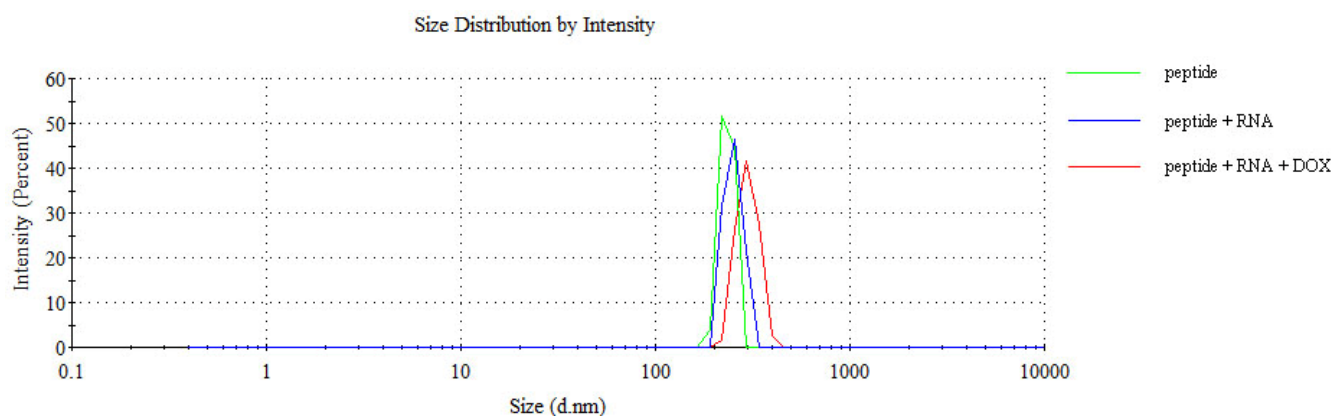

**Figure S3.** Zeta potential of peptide-nanovesicles detected by Malvern NANO ZS90 at the concentration from 0.0625 mg/mL to 0.5 mg/mL.

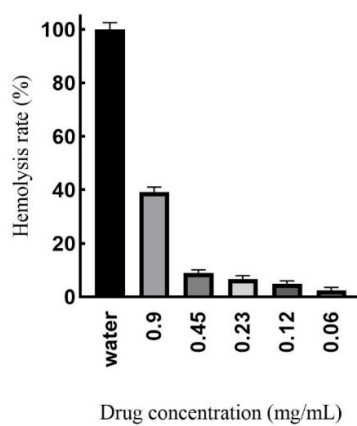

**Figure S4.** Hemolysis assay. Blood from SD rat were centrifuged and washed to get red blood cells. After incubation with different peptide and centrifugation, supernatant was detected at 545 nm.

|                           |   |      |     |   |     |    |     |     |
|---------------------------|---|------|-----|---|-----|----|-----|-----|
| FBS/ $\mu$ L              | 0 | 0    | 0   | 0 | 0   | 0  | 100 | 100 |
| peptide(1 mg/mL)/ $\mu$ L | 0 | 1.25 | 2.5 | 5 | 7.5 | 10 | 5   | 0   |
| RNA (10 $\mu$ M)/ $\mu$ L | 5 | 5    | 5   | 5 | 5   | 5  | 5   | 5   |

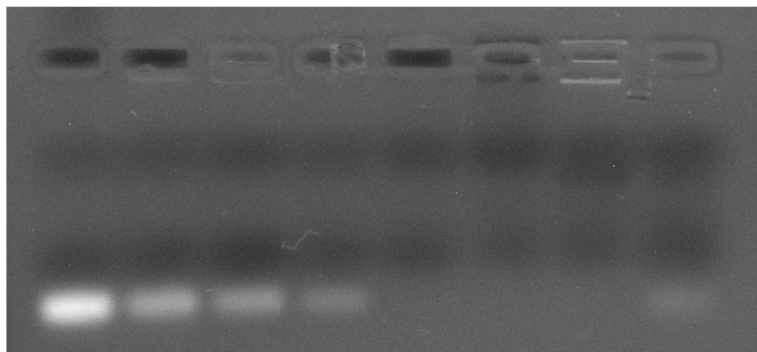

**Figure S5.** Gel retardation assays.

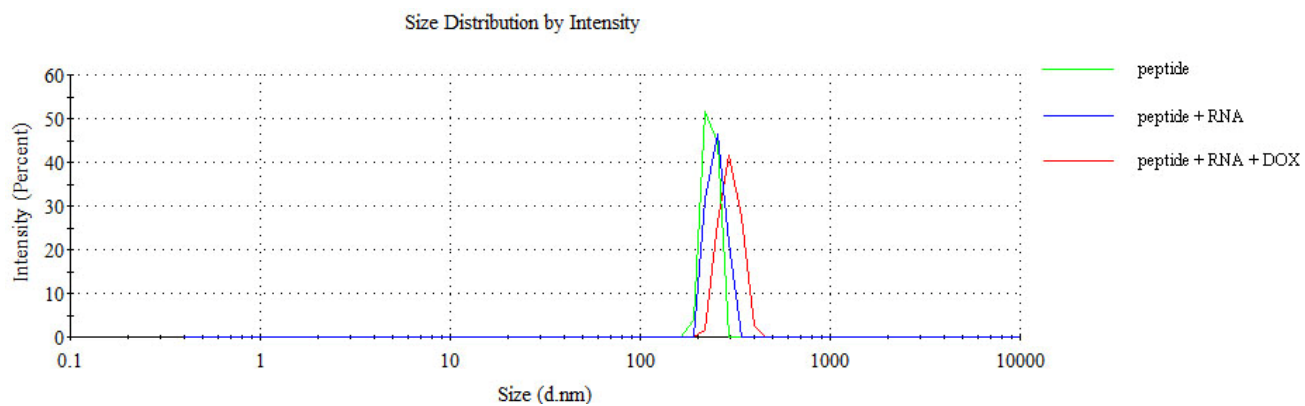

**Figure S6.** Sizes of peptide, peptide-RNA, peptide-RNA-DOX were detected by DLS.

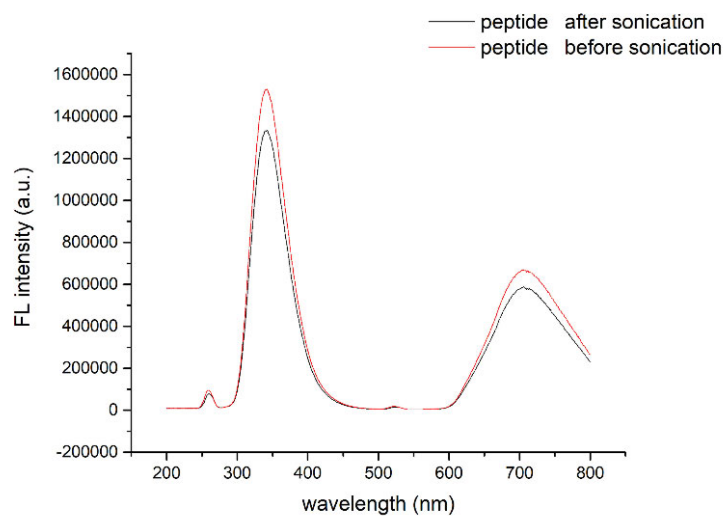

**Figure S7.** Fluorescence spectra of peptide before and after sonication.

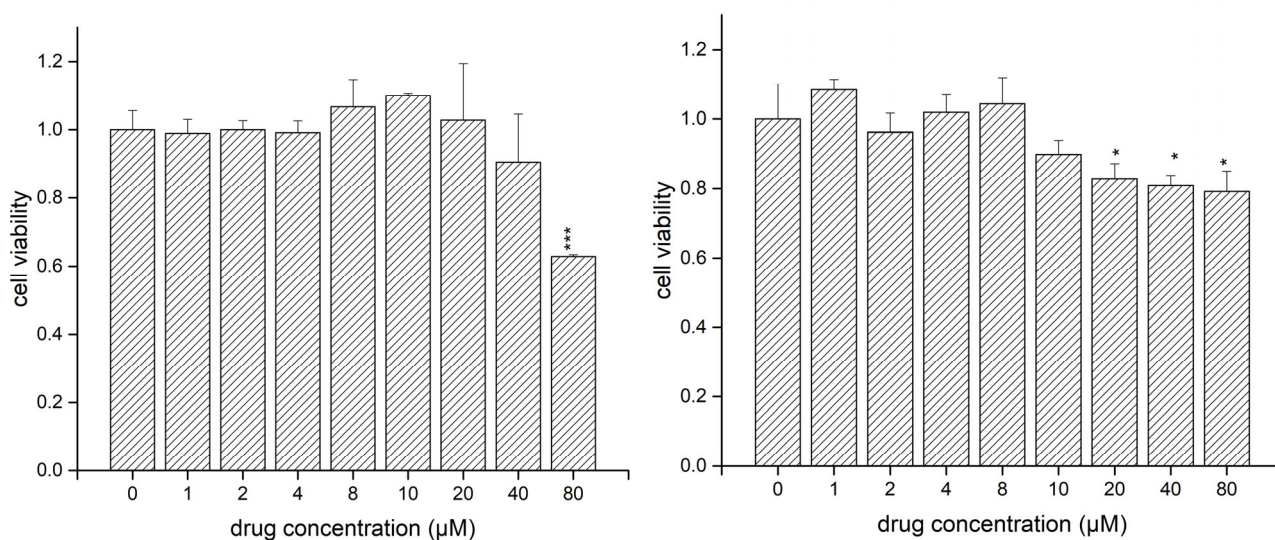

**Figure S8.** MTT assay carried with MDA-MB-231 (left) cells and HUVEC cells (right). \* $p < 0.05$ , \*\* $p < 0.01$ , \*\*\* $p < 0.001$ ,  $n = 3$ .

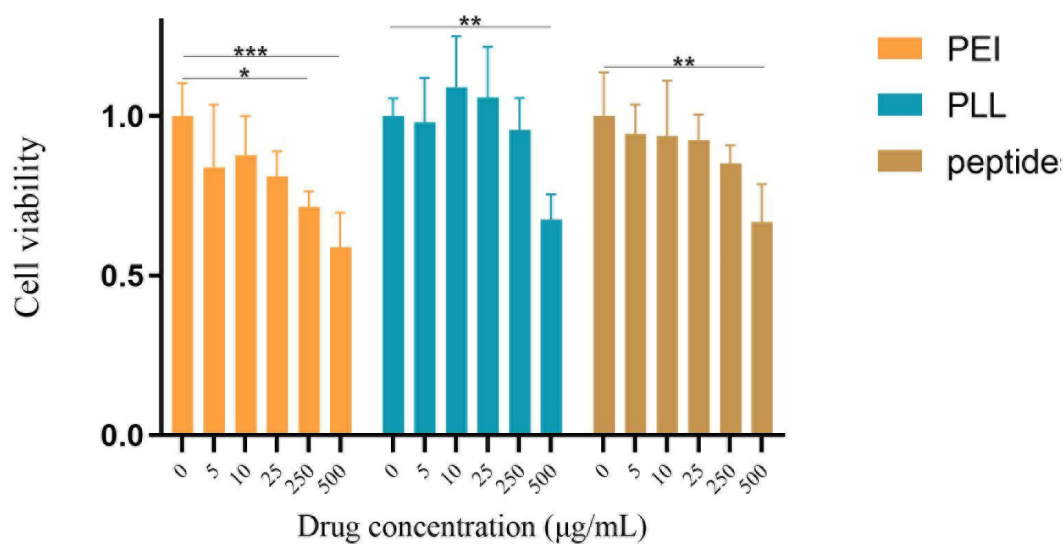

**Figure S9.** Peptide were compared to PEI and PLL. Their biocompatibilities were assessed by MTT assays. \* $p < 0.05$ , \*\* $p < 0.01$ , \*\*\* $p < 0.001$ ,  $n = 3$ .

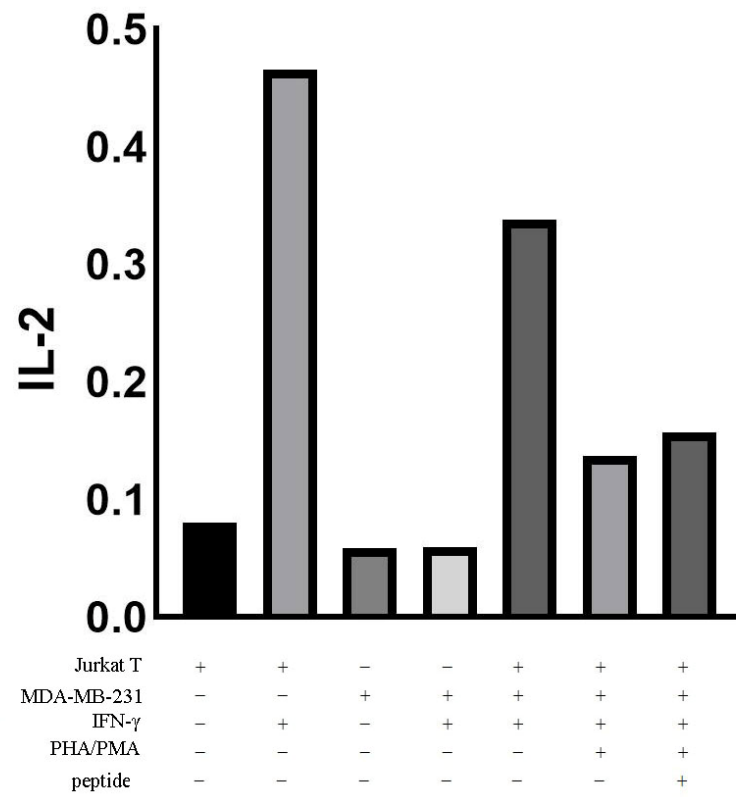

**Figure S10.** Peptide blockades the PD-1/PD-L1 process in vitro.

Incubation time: 1 h

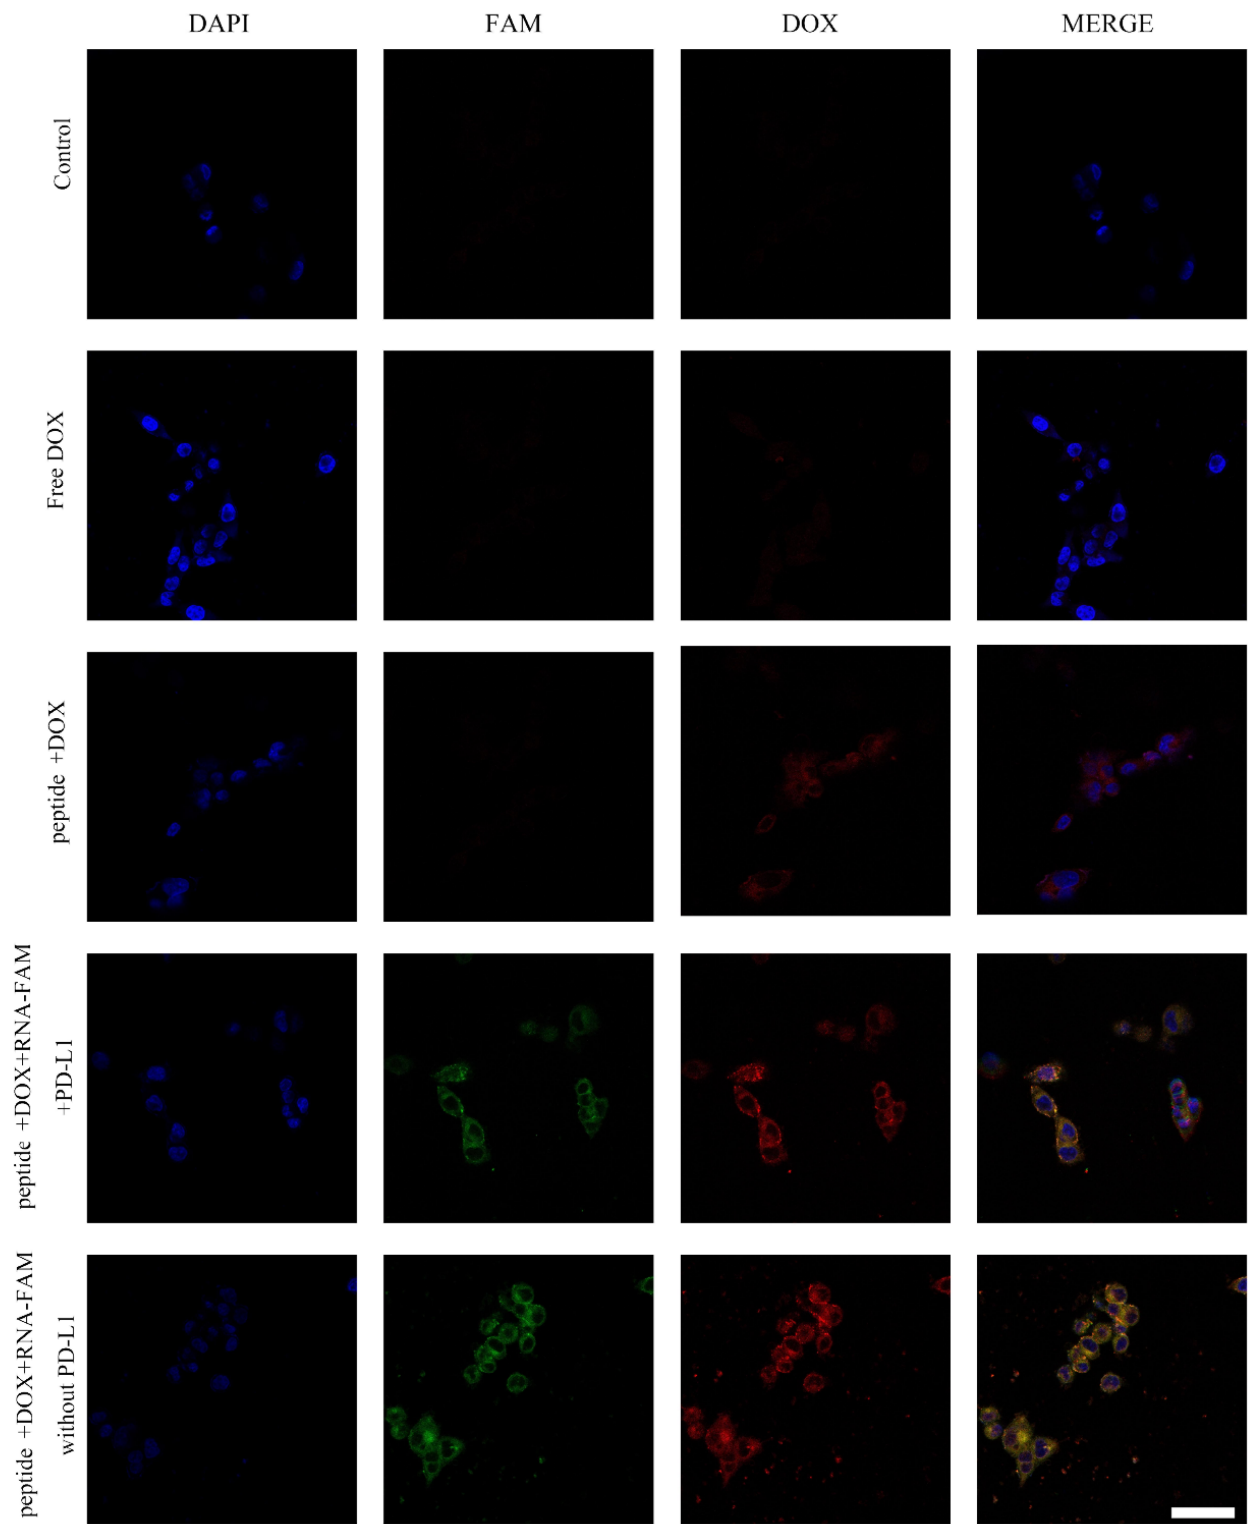

Incubation time: 2 h

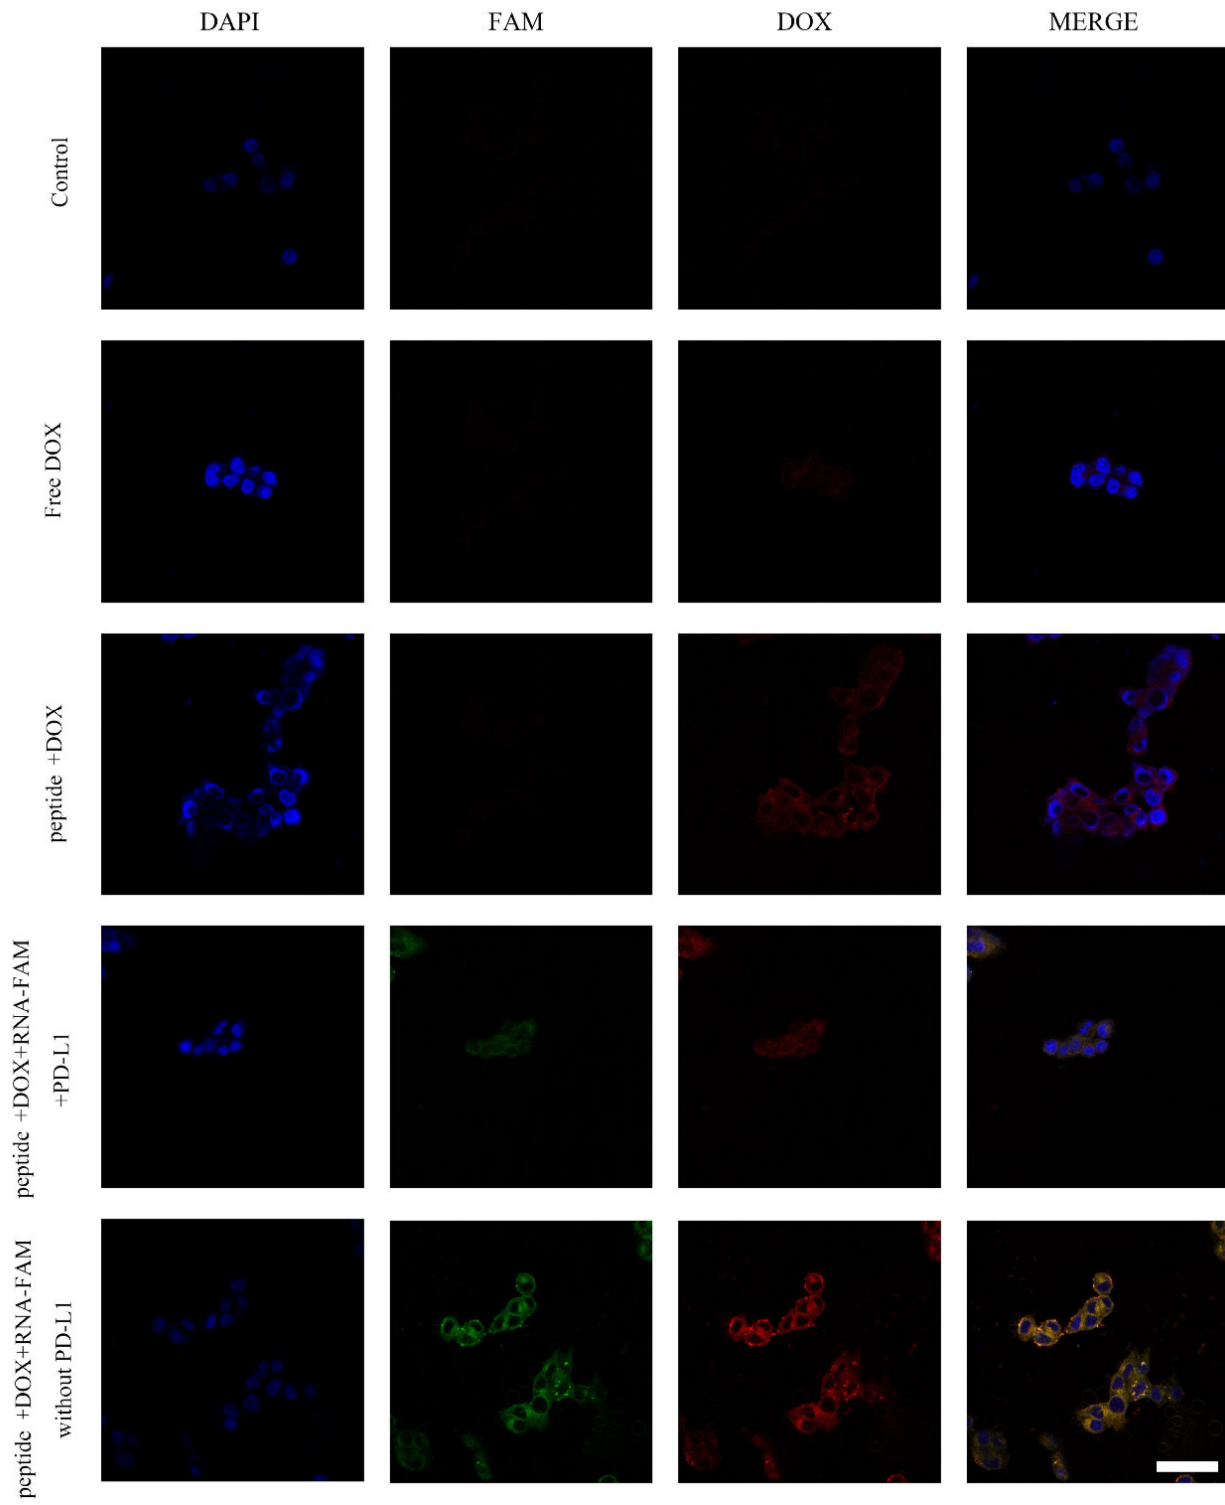

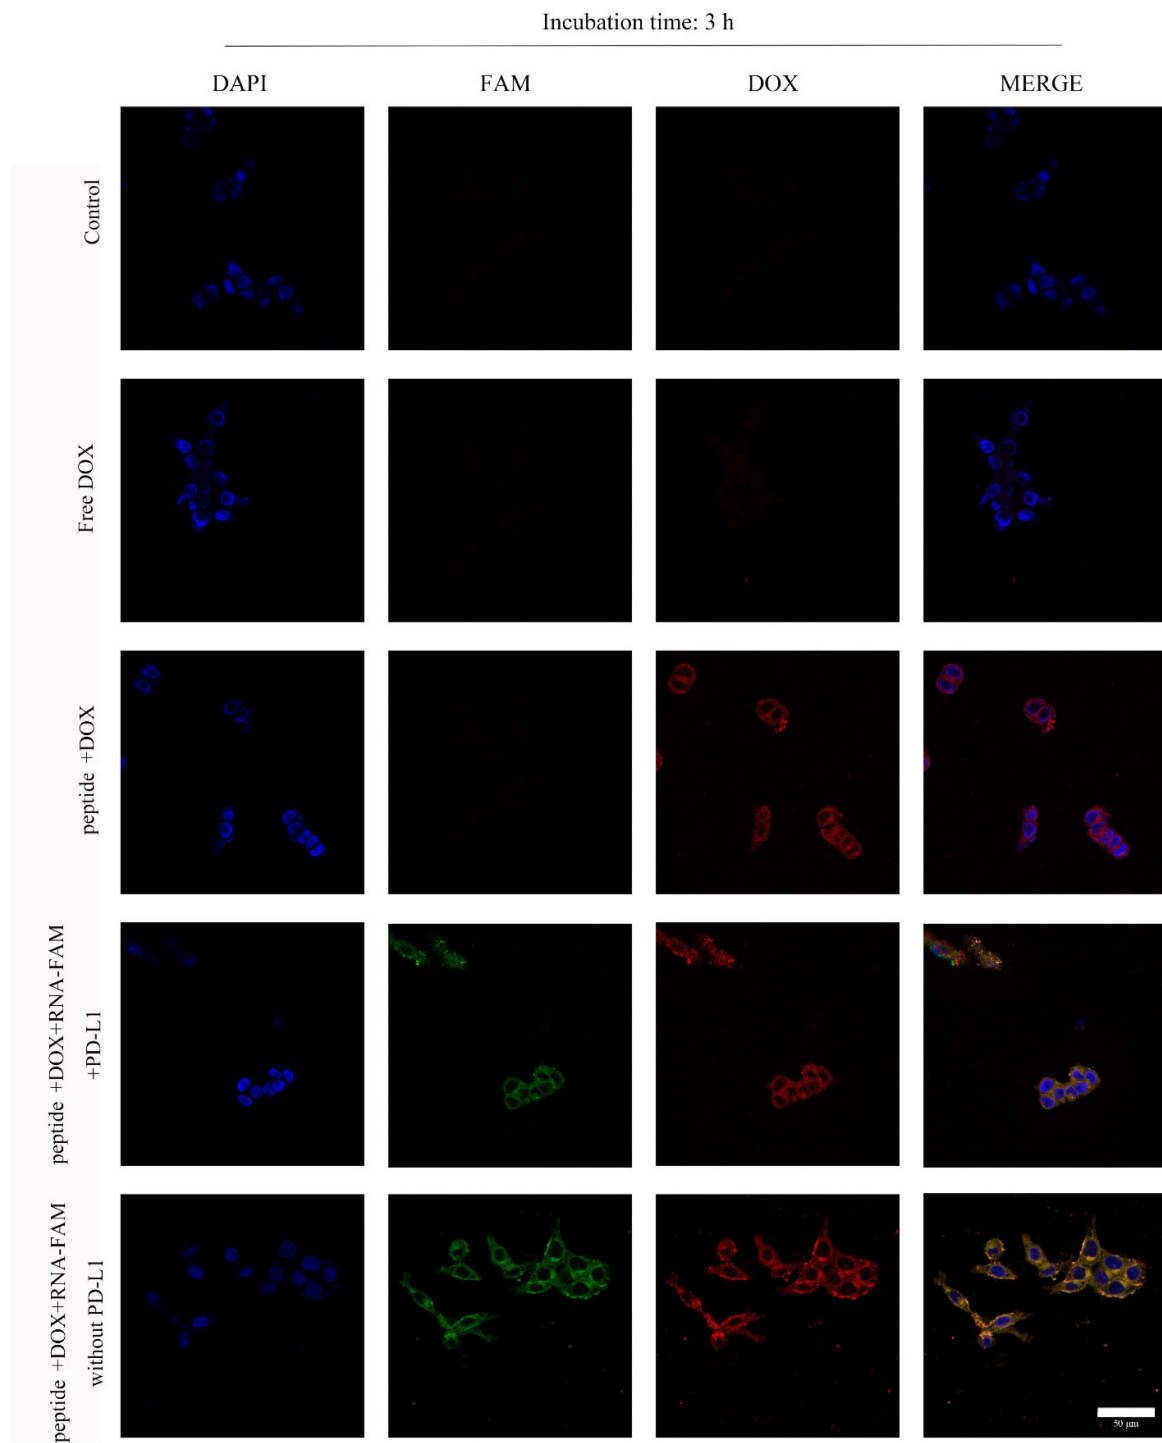

**Figure S11.** CLSM of peptide, peptide-RNA, peptide-RNA-DOX after 1h, 2h, 3h. CLSM images of cells after the incubation with PBS (the first line), free DOX (the second line), peptide-DOX (the third line), peptide-RNA-DOX with PD-L1 proteins (the fourth line), peptide-RNA-DOX (the fifth line). Scale bar 50  $\mu$ m.



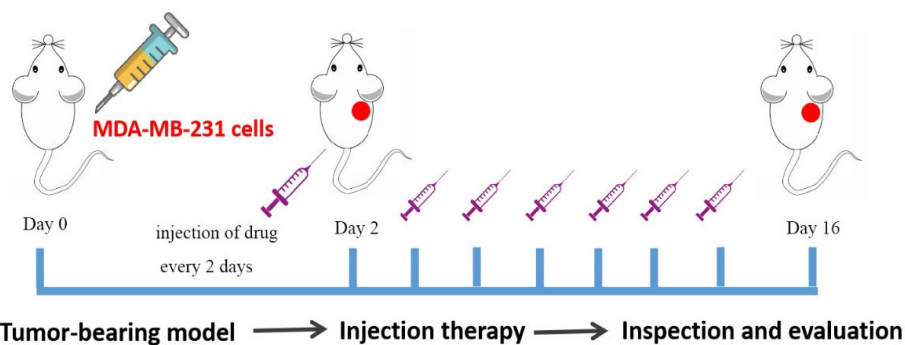

**Figure S12.** Illustration of the experimental flow chart of tumor-bearing mice. Tumor cells were injected 2 days before the administration of drugs. Then drugs were injected into the vicinity of tumor nodes once every 2 days.

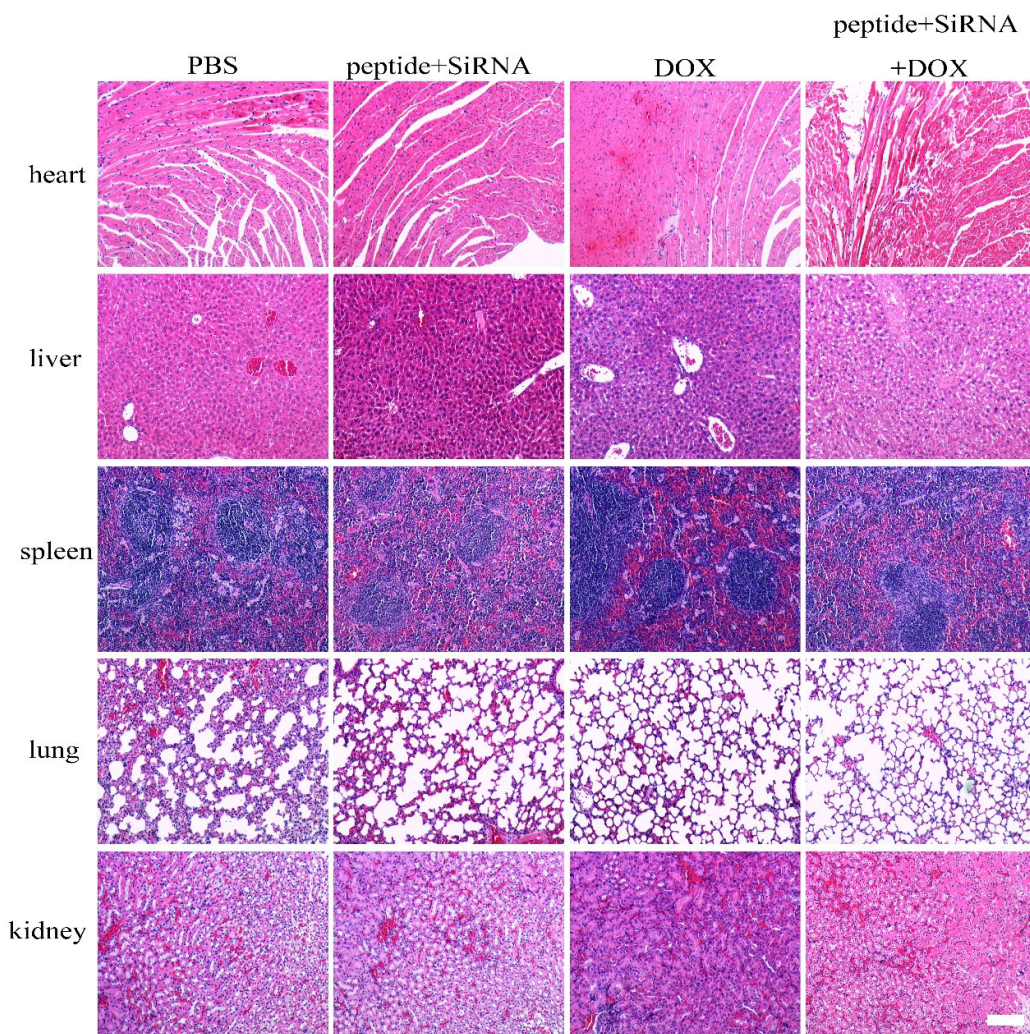

**Figure S13.** H&E staining of hearts, livers, spleens, lungs, and kidneys. Mice administrated with PBS, free DOX, peptide-RNA, and peptide-RNA-DOX were sacrificed 16 days after the treatment. Significant decrease in lung metastasis can be observed. Heart inflammation was obvious when using DOX. Scale bar. 200  $\mu$ m.

**Table S1.** Actual drug loading (DLC) and drug loading rate (DLE) at theoretical dosage.ratios of 10%, 20%, and 30%.

|                          | Theoretical<br>DLC (wt%) | DLC<br>(wt%) | DLE<br>(wt%) |
|--------------------------|--------------------------|--------------|--------------|
| Peptide-DOX              | 10                       | 10.1 ± 0.59  | 101.1 ± 5.9  |
|                          | 20                       | 10.6 ± 0.75  | 106.3 ± 7.5  |
|                          | 30                       | 7.2 ± 0.39   | 72.0 ± 3.9   |
| Peptide-Nucleic acid-DOX | 10                       | 10.2 ± 0.60  | 102.2 ± 6.0  |
|                          | 20                       | 10.4 ± 0.62  | 103.8 ± 6.2  |
|                          | 30                       | 8.65 ± 0.26  | 86.5 ± 2.6   |
